# Supplementary material for: Synthesis of phenyl substituted bisphosphonates and crystal structures and characterization of Cd complexes of (dichloromethylene)bisphosphonic acid phenyl and alkyl ester derivatives
Source: Royal Society of Chemistry journal article supplement (doi:10.1039/b907874f), 2009-01-01
Supplement: b907874f.pdf [file b907874f.pdf]

## Electronic Supplementary Information

### Synthesis of phenyl substituted bisphosphonates and crystal structures and characterization of Cd complexes of (dichloromethylene)bisphosphonic acid phenyl and alkyl ester derivatives

Jonna Jokiniemi\*, Jouko. J. Vepsäläinen, Harri Nätkinniemi, Sirpa Peräniemi and Markku Ahlgren

**Table S2.** Selected bond lengths (Å) and angles (°) for compounds 7–9

|                  | 7          | 8          | 9          |
|------------------|------------|------------|------------|
| P(1)–O(11)       | 1.492(2)   | 1.522(2)   | 1.535(2)   |
| P(1)–O(12)       | 1.495(2)   | 1.518(2)   | 1.514(2)   |
| P(1)–O(13)       | 1.588(2)   | 1.516(2)   | 1.513(2)   |
| P(2)–O(21)       | 1.519(2)   | 1.574(2)   | 1.505(2)   |
| P(2)–O(22)       | 1.525(2)   | 1.590(2)   | 1.497(2)   |
| P(2)–O(23)       | 1.516(2)   | 1.469(2)   | 1.569(2)   |
| P(3)–O(31)       | 1.499(2)   |            |            |
| P(3)–O(32)       | 1.495(2)   |            |            |
| P(3)–O(33)       | 1.587(2)   |            |            |
| P(4)–O(41)       | 1.515(2)   |            |            |
| P(4)–O(42)       | 1.523(2)   |            |            |
| P(4)–O(43)       | 1.505(2)   |            |            |
| P(1)–C(1)        | 1.846(3)   | 1.876(3)   | 1.856(3)   |
| P(2)–C(1)        | 1.867(3)   | 1.831(3)   | 1.858(3)   |
| P(3)–C(2)        | 1.849(2)   |            |            |
| P(4)–C(2)        | 1.868(3)   |            |            |
| O(11)–P(1)–C(1)  | 108.32(11) | 104.99(11) | 105.18(10) |
| O(12)–P(1)–C(1)  | 106.63(11) | 105.08(12) | 104.04(10) |
| O(13)–P(1)–C(1)  | 105.88(11) | 104.34(11) | 107.85(11) |
| O(21)–P(2)–C(1)  | 106.71(11) | 102.81(12) | 106.31(10) |
| O(22)–P(2)–C(1)  | 106.64(10) | 105.03(12) | 109.88(11) |
| O(23)–P(2)–C(1)  | 105.43(11) | 114.25(12) | 105.54(11) |
| O(31)–P(3)–C(2)  | 109.01(11) |            |            |
| O(32)–P(3)–C(2)  | 107.12(11) |            |            |
| O(33)–P(3)–C(2)  | 102.17(11) |            |            |
| O(41)–P(4)–C(2)  | 105.98(11) |            |            |
| O(42)–P(4)–C(2)  | 105.20(11) |            |            |
| O(43)–P(4)–C(2)  | 106.01(11) |            |            |
| P(1)–C(1)–P(2)   | 113.77(14) | 115.62(15) | 113.12(13) |
| P(3)–C(2)–P(4)   | 114.22(14) |            |            |
| Cl(1)–C(1)–Cl(2) | 108.79(14) | 109.27(15) | 108.09(13) |
| Cl(3)–C(2)–Cl(4) | 108.72(14) |            |            |

**Table S3.** Selected bond lengths (Å) and angles (°) around the metal atoms in compounds 7–9<sup>a</sup>

| 7                  |           | 8                  |           | 9                   |           |                     |           |
|--------------------|-----------|--------------------|-----------|---------------------|-----------|---------------------|-----------|
| Cd(1)–O(1)         | 2.310(2)  | Cd(3)–O(4)         | 2.338(2)  | Cd(1)–O(1)          | 2.311(2)  | Cd(1)–O(1)          | 2.293(2)  |
| Cd(1)–O(11)        | 2.278(2)  | Cd(3)–O(5)         | 2.355(2)  | Cd(1)–O(2)          | 2.341(2)  | Cd(1)–O(11)         | 2.278(2)  |
| Cd(1)–O(21)        | 2.256(2)  | Cd(3)–O(22)        | 2.371(2)  | Cd(1)–O(3)          | 2.338(2)  | Cd(1)–O(21)         | 2.266(2)  |
| Cd(2)–O(2)         | 2.311(2)  | Cd(3)–O(32)        | 2.280(2)  | Cd(1)–O(11)         | 2.257(2)  | Cd(2)–O(1)          | 2.573(2)  |
| Cd(2)–O(3)         | 2.402(2)  | Cd(3)–O(42)        | 2.232(2)  | Cd(1)–O(12a)        | 2.261(2)  | Cd(2)–O(2)          | 2.307(2)  |
| Cd(2)–O(12)        | 2.263(2)  | Cd(3)–O(43c)       | 2.188(2)  | Cd(1)–O(13b)        | 2.279(2)  | Cd(2)–O(11c)        | 2.365(2)  |
| Cd(2)–O(22)        | 2.258(2)  | Cd(4)–O(6)         | 2.338(2)  |                     |           | Cd(2)–O(12)         | 2.318(2)  |
| Cd(2)–O(23b)       | 2.193(2)  | Cd(4)–O(31)        | 2.305(2)  |                     |           | Cd(2)–O(13d)        | 2.262(2)  |
| Cd(2)–O(42)        | 2.348(2)  | Cd(4)–O(41)        | 2.189(2)  |                     |           | Cd(2)–O(22)         | 2.241(2)  |
| O(21)–Cd(1)–O(21a) | 180.0(1)  | O(43c)–Cd(3)–O(42) | 169.14(6) | O(11)–Cd(1)–O(12a)  | 80.04(7)  | O(21)–Cd(1)–O(21e)  | 180.00(8) |
| O(11)–Cd(1)–O(11a) | 180.0(1)  | O(43c)–Cd(3)–O(32) | 101.99(6) | O(11)–Cd(1)–O(13b)  | 111.96(6) | O(11)–Cd(1)–O(11e)  | 180.00(8) |
| O(1)–Cd(1)–O(1a)   | 180.0(1)  | O(42)–Cd(3)–O(32)  | 87.08(6)  | O(12a)–Cd(1)–O(13b) | 166.41(6) | O(1)–Cd(1)–O(1e)    | 180.00(8) |
| O(21)–Cd(1)–O(11)  | 90.07(6)  | O(43c)–Cd(3)–O(4)  | 92.67(6)  | O(11)–Cd(1)–O(1)    | 99.44(7)  | O(21)–Cd(1)–O(11)   | 90.01(6)  |
| O(21)–Cd(1)–O(11a) | 89.93(6)  | O(42)–Cd(3)–O(4)   | 95.06(6)  | O(12a)–Cd(1)–O(1)   | 89.12(7)  | O(21)–Cd(1)–O(11e)  | 89.99(6)  |
| O(21)–Cd(1)–O(1)   | 93.51(6)  | O(32)–Cd(3)–O(4)   | 78.14(7)  | O(13b)–Cd(1)–O(1)   | 82.73(7)  | O(21)–Cd(1)–O(1)    | 88.04(6)  |
| O(21)–Cd(1)–O(1a)  | 86.49(6)  | O(43c)–Cd(3)–O(5)  | 80.05(6)  | O(11)–Cd(1)–O(3)    | 84.54(7)  | O(21)–Cd(1)–O(1e)   | 91.96(6)  |
| O(11)–Cd(1)–O(1)   | 87.82(7)  | O(42)–Cd(3)–O(5)   | 90.43(6)  | O(12a)–Cd(1)–O(3)   | 101.54(7) | O(11)–Cd(1)–O(1)    | 86.71(6)  |
| O(11)–Cd(1)–O(1a)  | 92.18(7)  | O(32)–Cd(3)–O(5)   | 118.40(7) | O(13b)–Cd(1)–O(3)   | 86.43(7)  | O(11)–Cd(1)–O(1e)   | 93.29(6)  |
| O(23b)–Cd(2)–O(22) | 165.85(7) | O(4)–Cd(3)–O(5)    | 162.89(7) | O(1)–Cd(1)–O(3)     | 169.16(7) | O(22)–Cd(2)–O(13d)  | 109.37(6) |
| O(23b)–Cd(2)–O(12) | 98.56(6)  | O(43c)–Cd(3)–O(22) | 94.16(6)  | O(11)–Cd(1)–O(2)    | 165.42(6) | O(22)–Cd(2)–O(2)    | 162.97(6) |
| O(22)–Cd(2)–O(12)  | 86.50(6)  | O(42)–Cd(3)–O(22)  | 78.51(6)  | O(12a)–Cd(1)–O(2)   | 87.36(7)  | O(13d)–Cd(2)–O(2)   | 82.42(6)  |
| O(23b)–Cd(2)–O(2)  | 86.39(6)  | O(32)–Cd(3)–O(22)  | 159.16(6) | O(13b)–Cd(1)–O(2)   | 81.46(7)  | O(22)–Cd(2)–O(12)   | 80.71(6)  |
| O(22)–Cd(2)–O(2)   | 79.75(6)  | O(4)–Cd(3)–O(22)   | 88.13(6)  | O(1)–Cd(1)–O(2)     | 87.59(7)  | O(13d)–Cd(2)–O(12)  | 155.22(6) |
| O(12)–Cd(2)–O(2)   | 121.86(7) | O(5)–Cd(3)–O(22)   | 77.08(6)  | O(3)–Cd(1)–O(2)     | 90.88(7)  | O(2)–Cd(2)–O(12)    | 83.76(6)  |
| O(23b)–Cd(2)–O(42) | 103.32(6) | O(41)–Cd(4)–O(41d) | 180.00(5) |                     |           | O(22)–Cd(2)–O(11c)  | 108.14(6) |
| O(22)–Cd(2)–O(42)  | 78.49(6)  | O(31)–Cd(4)–O(31d) | 180.00(5) |                     |           | O(13d)–Cd(2)–O(11c) | 106.85(6) |
| O(12)–Cd(2)–O(42)  | 146.21(7) | O(6)–Cd(4)–O(6d)   | 180.00(5) |                     |           | O(2)–Cd(2)–O(11c)   | 78.80(6)  |
| O(2)–Cd(2)–O(42)   | 85.25(7)  | O(41)–Cd(4)–O(31)  | 90.33(6)  |                     |           | O(12)–Cd(2)–O(11c)  | 90.44(6)  |
| O(23b)–Cd(2)–O(3)  | 95.47(6)  | O(41)–Cd(4)–O(31d) | 89.67(6)  |                     |           | O(22)–Cd(2)–O(1)    | 88.64(6)  |
| O(22)–Cd(2)–O(3)   | 98.59(6)  | O(41)–Cd(4)–O(6)   | 94.96(6)  |                     |           | O(13d)–Cd(2)–O(1)   | 78.70(6)  |
| O(12)–Cd(2)–O(3)   | 75.89(7)  | O(41)–Cd(4)–O(6d)  | 85.04(6)  |                     |           | O(2)–Cd(2)–O(1)     | 81.56(6)  |
| O(2)–Cd(2)–O(3)    | 161.77(7) | O(31)–Cd(4)–O(6)   | 90.44(6)  |                     |           | O(12)–Cd(2)–O(1)    | 79.00(6)  |
| O(42)–Cd(2)–O(3)   | 76.67(6)  | O(31)–Cd(4)–O(6d)  | 89.56(6)  |                     |           | O(11c)–Cd(2)–O(1)   | 158.60(6) |

<sup>a</sup> Symmetry transformations used to generate equivalent atoms for 7: a 1 – x, –y, z; b x – 1, y, z; c 1 + x, y, z; d –x, –y, 1 – z; for 8: a 1 – x, y – 0.5, 1 – z; b 1 + x, y, z; for 9: c x, –y, 0.5 + z; d 0.5 – x, 0.5 + y, 0.5 – z; e 0.5 – x, 0.5 – y, –z.

**Table S4.** Hydrogen-bond geometry (Å, °) in compound 9

| D – H...A      | D – H | H...A | D...A    | D – H...A | Symmetry operation                                      |
|----------------|-------|-------|----------|-----------|---------------------------------------------------------|
| O1 – H1B...O3  | 0.99  | 1.81  | 2.784(3) | 168       | $[-x + \frac{1}{2}, y + \frac{1}{2}, -z + \frac{1}{2}]$ |
| O1 – H1A...O12 | 0.99  | 1.87  | 2.668(2) | 136       | $[-x + \frac{1}{2}, y + \frac{1}{2}, -z + \frac{1}{2}]$ |
| O2 – H2A...O3  | 0.84  | 1.86  | 2.696(3) | 172       |                                                         |
| O2 – H2B...O21 | 0.85  | 1.90  | 2.745(2) | 176       | $[-x + \frac{1}{2}, y - \frac{1}{2}, -z + \frac{1}{2}]$ |
| O3 – H3A...O6  | 0.86  | 1.94  | 2.788(3) | 174       | $[-x + \frac{1}{2}, -y + \frac{1}{2}, z + 1]$           |
| O3 – H3B...O4  | 0.86  | 1.93  | 2.772(3) | 170       | $[-x + \frac{1}{2}, y - \frac{1}{2}, -z + \frac{1}{2}]$ |
| O4 – H4A...O22 | 0.85  | 2.03  | 2.864(3) | 164       |                                                         |
| O4 – H4B...O2  | 0.85  | 1.93  | 2.754(3) | 162       | $[-x + \frac{1}{2}, -y + \frac{1}{2}, z + 1]$           |
| O5 – H5A...O4  | 0.85  | 1.99  | 2.815(3) | 163       |                                                         |
| O5 – H5B...O6  | 0.85  | 2.06  | 2.906(3) | 171       |                                                         |
| O6 – H6A...O8  | 0.85  | 2.02  | 2.828(3) | 159       |                                                         |
| O7 – H7...O5   | 0.84  | 2.01  | 2.837(3) | 166       |                                                         |
| O6 – H6B...O7  | 0.84  | 2.28  | 2.861(3) | 126       | $[-x, -y + 1, -z + 1]$                                  |

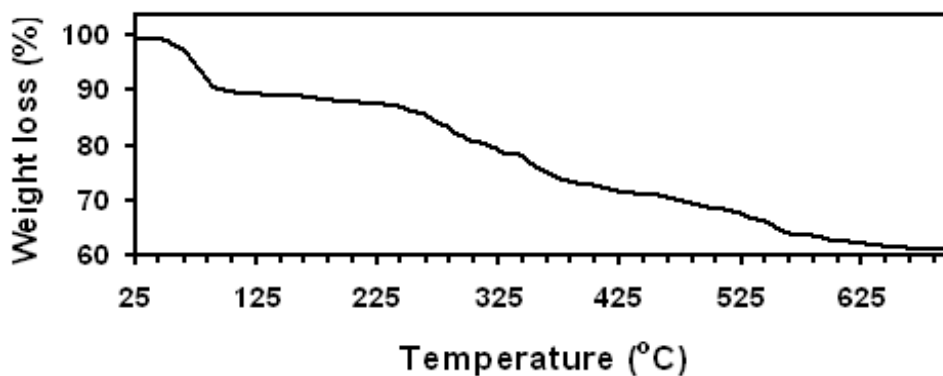

**Figure S1:** A thermogravimetric curve of  $[\{\text{Cd}_3(\text{Cl}_2\text{CP}_2\text{O}_6\text{Ph})_2(\text{H}_3\text{COH})(\text{H}_2\text{O})_5\}(\text{H}_2\text{O})_2]_n$  (**7**) performed under synthetic air in a temperature range of 25–700 °C and at a heating rate of 5 °C /min.

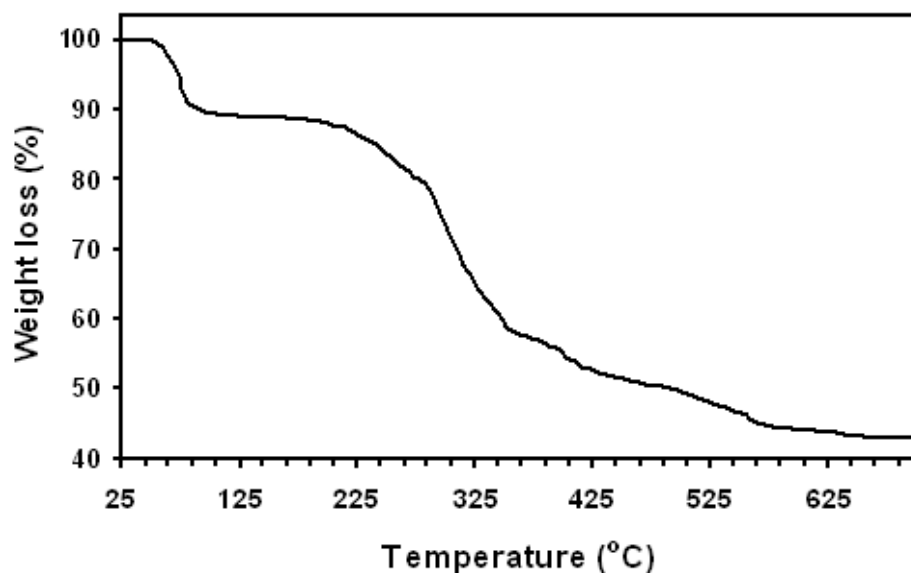

**Figure S2:** A thermogravimetric curve of  $[\{\text{Cd}(\text{Cl}_2\text{CP}_2\text{O}_6\text{Ph}_2)(\text{H}_2\text{O})_3\}(\text{H}_2\text{O})]_n$  (**8**) performed under synthetic air in a temperature range of 25–700 °C and at a heating rate of 5 °C /min.

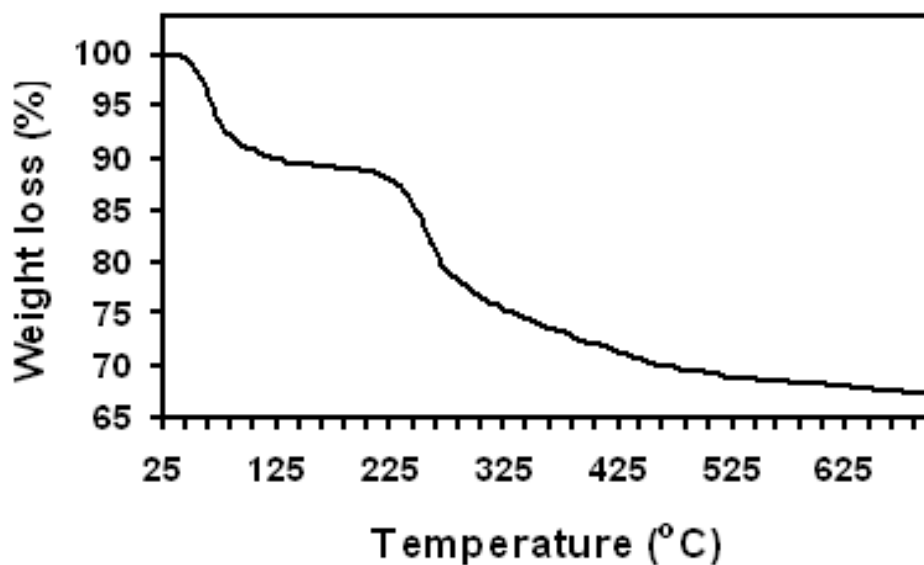

**Figure S3:** A thermogravimetric curve of  $[\{\text{Cd}_{1.5}(\text{Cl}_2\text{CP}_2\text{O}_6\text{Et})(\text{H}_2\text{O})_2\}(\text{C}_3\text{H}_6\text{O})_{0.5}(\text{H}_2\text{O})_{4.5}]_n$  (**9**) performed under synthetic air in a temperature range of 25–700 °C and at a heating rate of 5 °C /min.

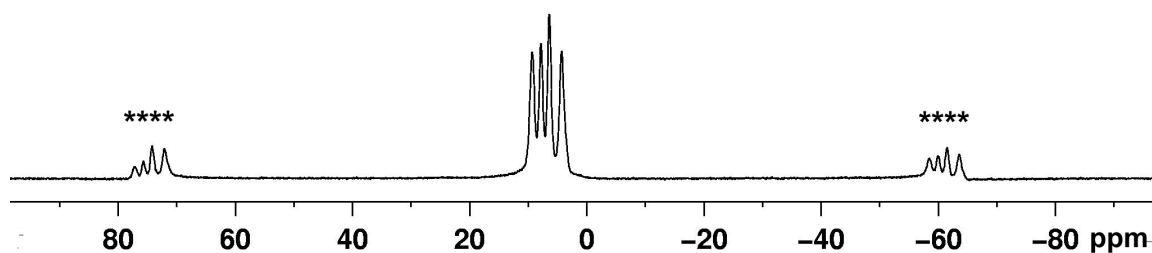

**Fig S4:** 31P-CP/MAS NMR spectrum of compound **7**, asterisks denote spinning sidebands.

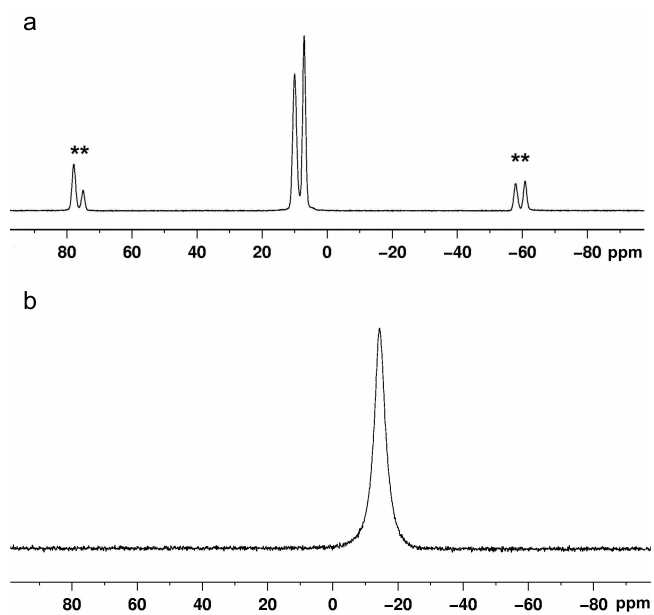

**Fig. S5:** (a)  $^{31}\text{P}$ -CP/MAS NMR spectrum (top) and (b)  $^{113}\text{Cd}$ -CP/MAS NMR spectrum (bottom) of compound **8**, asterisks denote spinning sidebands.

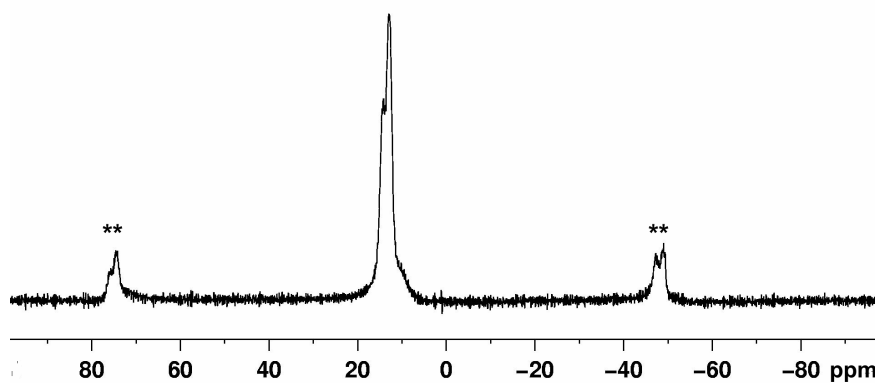

**Fig S6:**  $^{31}\text{P}$ -CP/MAS NMR spectrum of compound **9**, asterisks denote spinning sidebands.
